# Supplementary material
Source: MDPI journal article supplement (https://www.mdpi.com/1996-1073/11/6/1590)
Supplement: s1 [file s1]

# One-Pot Hydrothermal Synthesis of Novel Cu-MnS with PVP Cabbage-Like Nanostructures for High-Performance Supercapacitors

S. Srinivasa Rao <sup>1</sup>, Ikkurthi Kanaka Durga <sup>2</sup>, Bandari Naresh <sup>2</sup>, Bak Jin-Soo <sup>2</sup>, T.N.V. Krishna <sup>2</sup>, Cho In-Ho <sup>2</sup>, Jin-Woo Ahn <sup>1</sup>, and Hee-Je Kim <sup>2,\*</sup>

<sup>1</sup> Department of Mechatronics Engineering, Kyungsung University, 309 Suyeong-ro, Nam-gu, Busan 48434, Korea; srinu.krs@gmail.com (S.S.R.); jwahn@ks.ac.kr (J.-W.A.)

<sup>2</sup> School of Electrical Engineering, Pusan National University, Busandaehak-ro 63beon-gil, Geumjeong-gu, Busan 46241, Korea; kanakadurga.ikkurthi@gmail.com (I.K.D.); naresh1.bandari@gmail.com (B.N.); imjsn17@pusan.ac.kr (B.-J.S.); vamsik.tirumalasetty@gmail.com (T.N.V.K.); whdlsgh92@icloud.com (C.I.-H.)

\* Correspondence: heeje@pusan.ac.kr; Tel.: +82-51-510-2364; Fax: +82-51-513-0212

## 1. Capacitance Calculation of Single Electrode from CV Curves

The specific capacitance ( $C_s$ ) and areal capacitance of the electrode could be calculated from their cyclic voltammetry curves by the following equations.

$$C_s = \frac{Q}{m} \times \Delta V = \int_{-v}^v \frac{I(V)dV}{mv\Delta V} \quad (S1)$$

$$Ca = \frac{\int_{-v}^v I(V)dV}{Sv\Delta V} \quad (S2)$$

Where  $C_s$  is the specific capacitance in F g<sup>-1</sup>,  $Q$  is the total charge obtained by integrating the positive and negative sweeps in a Curve (in coulomb, C),  $v$  is the scan rate in V/s,  $V$  is the voltage window between the positive and negative electrodes and  $m$  is the mass of the active materials electrodes (if the area  $Ca$  (mF/cm<sup>2</sup>) is more important for specific applications can be substituted by the electrode area.

## 2. Calculation of Capacitance, Energy Density and Power Density from Galvanostatic Charge-Discharge Curves

$$C_s = \frac{i\Delta t}{m\Delta V} \quad (S3)$$

$$Ca = \frac{\int_{-v}^v I(V)dV}{Sv\Delta V} \quad (S4)$$

$$P = \frac{E}{t} = \frac{i\Delta V}{2m} \times 1000 \quad (S5)$$

Where  $I$  is the discharge current in mA or A,

$\Delta t$  = discharge time difference in seconds

$E$  = energy density (Wh g<sup>-1</sup> or Wh cm<sup>-2</sup> or Wh cm<sup>-3</sup>)

P = power density (W g<sup>-1</sup> or W cm<sup>-2</sup> or W cm<sup>-3</sup>)

### 3. Calculation of specific capacitance, energy and power density for symmetric supercapacitor cell

The areal capacitance (*Ca*) and specific capacitance (*Cs*) of the symmetric supercapacitor device were calculated from CV according to equations.

$$C_S = 4 \times \int_{-v}^v \frac{I(V)dV}{mv\Delta V} \quad (S6)$$

$$C_a = 4 \times \int_{-v}^v I(V) \frac{dV}{Sv\Delta V} \quad (S7)$$

Where *S* is the total geometrical area of the thin film electrodes in symmetric testing cell. If the area replaced by mass of two electrodes the specific capacitance *Cs* (F/g).

The *Cs* and *Ca* of the symmetric supercapacitor device were calculated from their GCD curves according to the following equations.

$$C_S = 4 \times \frac{I\Delta t}{m\Delta V} \quad (S8)$$

$$C_a = 4 \times \frac{I\Delta t}{S\Delta V} \quad (S9)$$

For the symmetric device, the power and energy densities were calculated according to the following equations.

$$E_D = C \frac{V^2}{2 \times 3.6(2m)} \quad (S10)$$

$$P_D = E_D \times \frac{3600}{T_s} \quad (S11)$$

Where *V* = voltage drop in the near-linear portion of the discharge curve after the IR drop (i.e. attainable cell voltage):

*m* = mass of active material on one electrode

*C* = total capacitance measured from the two-electrode system

*Ts* = is the discharge time

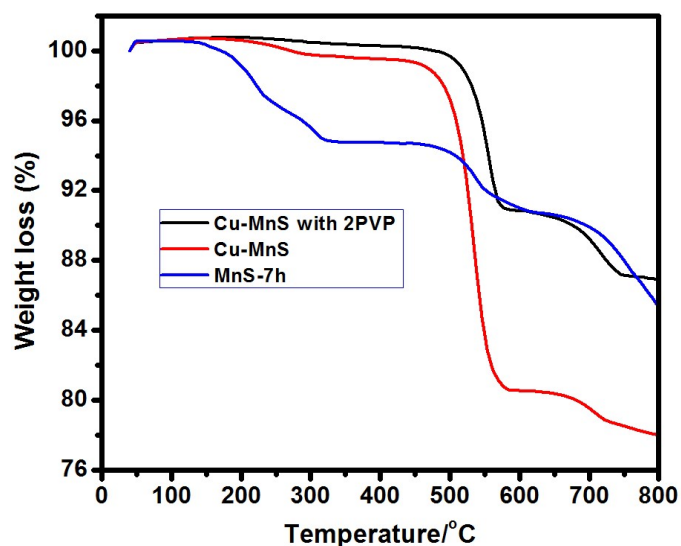

**Figure S1.** Thermogravimetric images of as-prepared MnS, Cu-MnS and Cu-MnS with 2PVP samples.

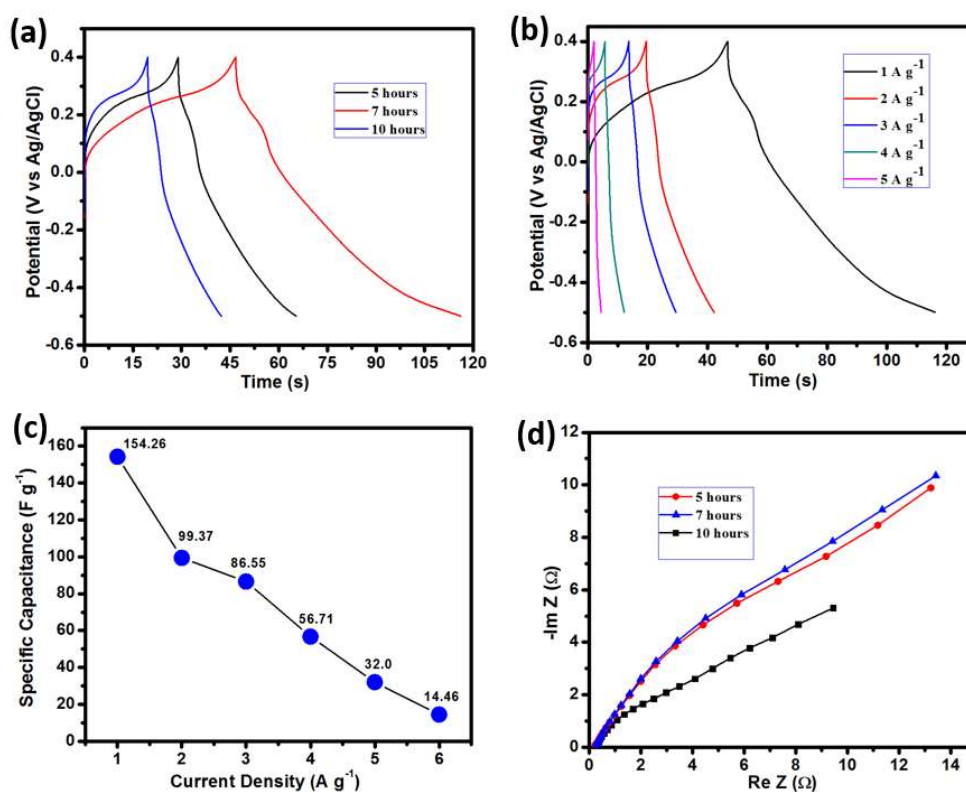

**Figure S2.** (a) Galvanostatic charge-discharge curves of supercapacitors using MnS material with different preparation time. (b) GCD curves of MnS-7 hours at different current densities. (c) Specific capacitance calculated from the GCD curves of MnS-7 hours as a function of current densities. (d) Nyquist curves in 2 M KOH solution at frequency range from 100 kHz to 0.1 Hz.

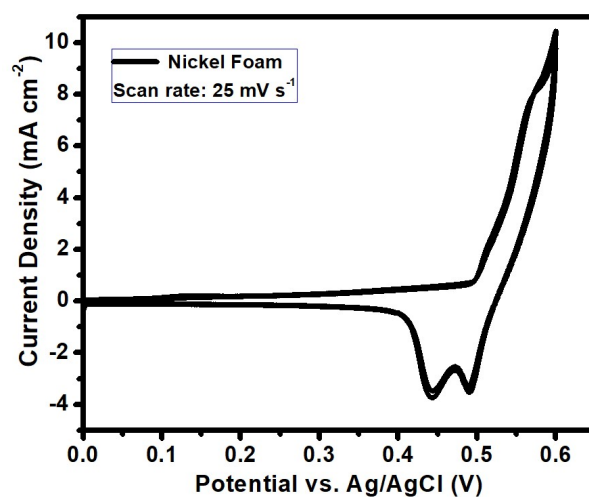

Figure S3. CV curve of bare nickel foam in KOH electrolyte at scan rate of  $25 \text{ mV s}^{-1}$ .

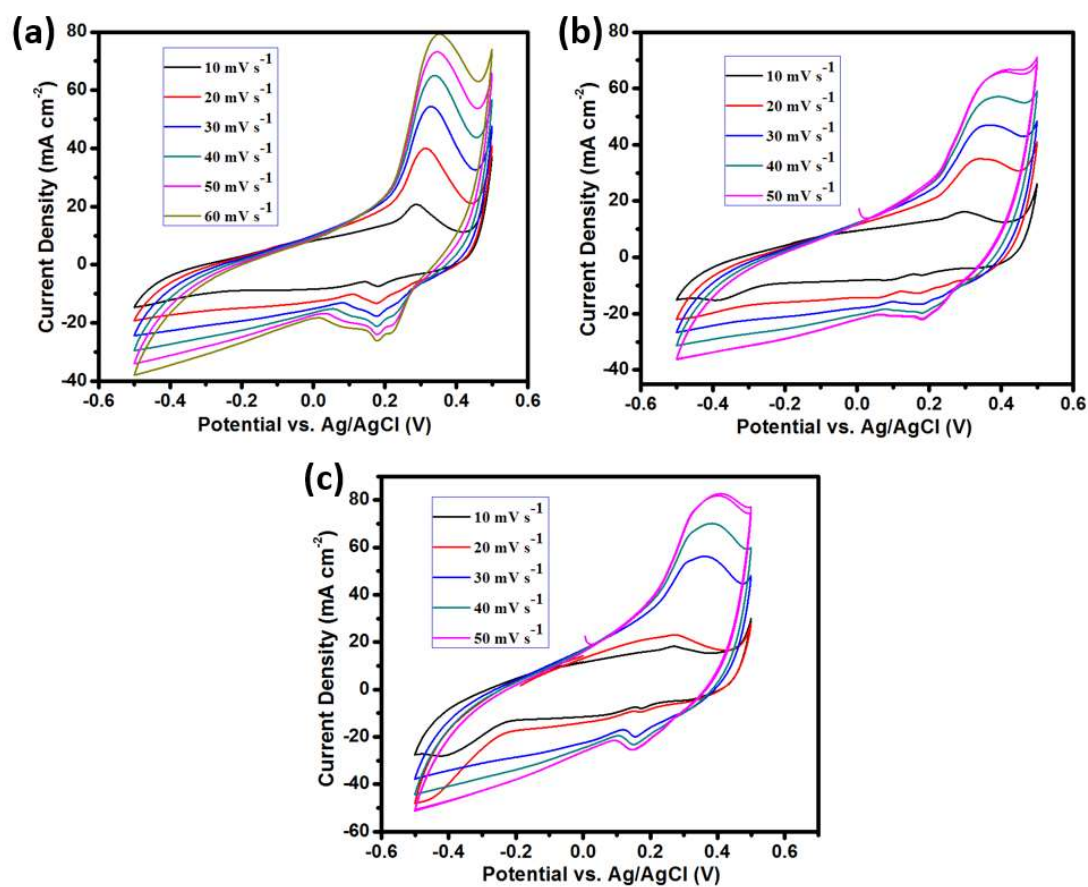

Figure S4. Cyclic voltammetry of (a) Cu-MnS, (b) Cu-MnS with 1PVP and (c) Cu-MnS with 3PVP with different scan rates in 2 M KOH solution.

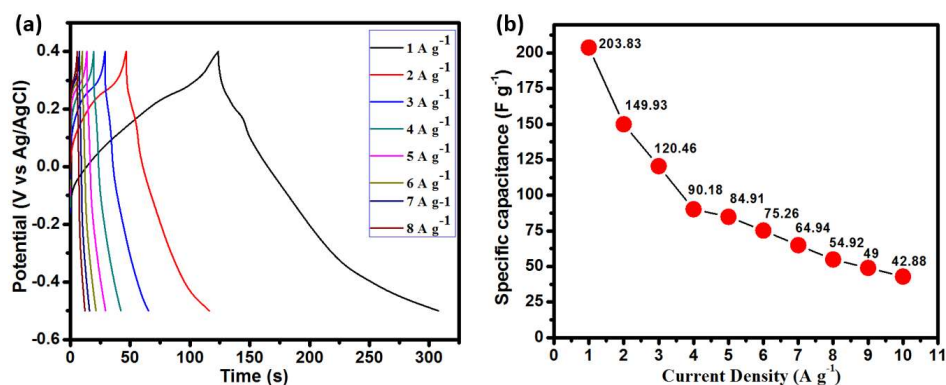

**Figure S5.** (a) Galvanostatic charge-discharge curves of Cu-MnS at different current densities in 2 M KOH solution. (b) Specific capacitance of Cu-MnS electrode calculated from the GCD curves as a function of current densities.

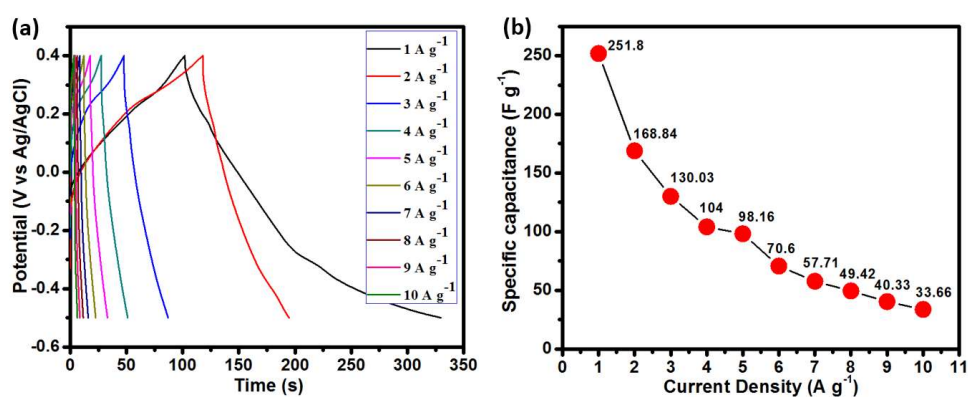

**Figure S6.** (a) Galvanostatic charge-discharge curves of Cu-MnS with 1PVP at different current densities in 2 M KOH solution. (b) Specific capacitance of Cu-MnS electrode calculated from the GCD curves as a function of current densities.

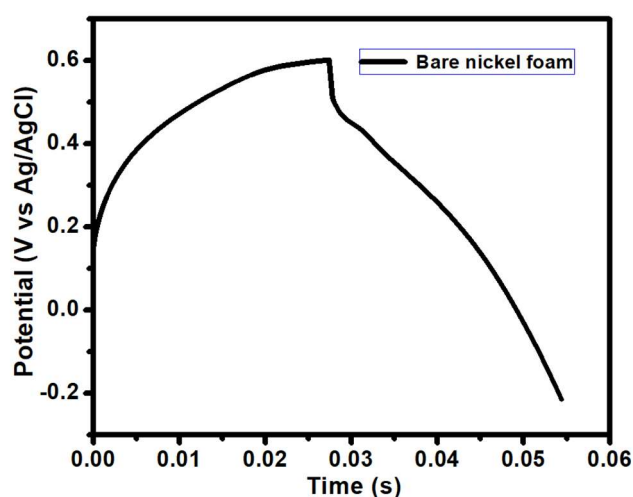

**Figure S7.** GCD curve of bare nickel foam in KOH electrolyte.

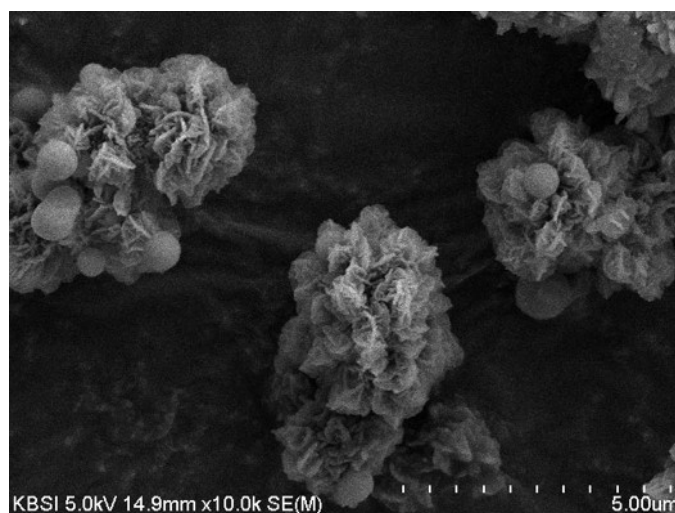

**Figure S8.** HR-SEM image of Cu-MnS with 2PVP after stability test.

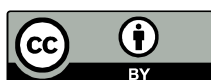

© 2018 by the authors. Submitted for possible open access publication under the terms and conditions of the Creative Commons Attribution (CC BY) license (<http://creativecommons.org/licenses/by/4.0/>).
